# Supplementary material for: Simultaneous Gene Delivery and Tracking through Preparation of Photo-Luminescent Nanoparticles Based on Graphene Quantum Dots and Chimeric Peptides
Source: PubMed Central journal article supplement (PMC5573361; doi:10.1038/s41598-017-09890-y), 2017-08-25
Supplement: 41598_2017_9890_MOESM1_ESM.pdf [file 41598_2017_9890_MOESM1_ESM.pdf]

**Simultaneous Gene Delivery and Tracking through Preparation of Photo-Luminescent Nanoparticles Based on Graphene Quantum Dots and Chimeric Peptides**

**Soroush Moasses Ghafary<sup>1</sup>, Maryam Nikkhah<sup>1</sup>, Shadie Hatamie<sup>2</sup>, Saman Hosseinkhani<sup>3\*</sup>**

<sup>1</sup> Department of Nanobiothechnology, Faculty of Biological Sciences, Tarbiat Modares University, Tehran, Iran

<sup>2</sup> Institute for Nanoscience and Nanotechnology (INST), Sharif University of Technology, Tehran, Iran

<sup>3</sup> Department of Biochemistry, Faculty of Biological Sciences, Tarbiat Modares University, Tehran, Iran

Corresponding author: [saman\\_h@modares.ac.ir](mailto:saman_h@modares.ac.ir)

Department of Biochemistry, Faculty of Biological Sciences, Tarbiat Modares University, P. O. Box: 14115-111, Tehran, Iran

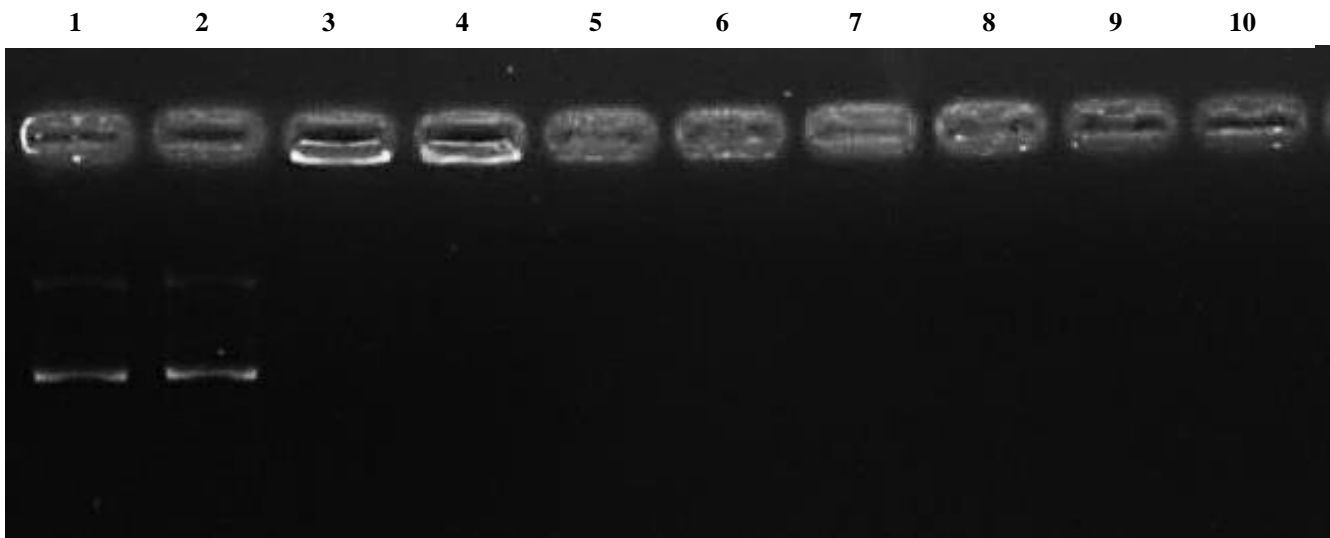

Supplementary Fig. S1. Agarose gel (1%) pDNA retardation assay. Lane 1 and its replicate lane 2 are free pDNA. Lane 3 and its replicate lane 4 are MPG-2H1/pDNA complex. Lane 5 and its replicate lane 8 are complex 1. Lane 6 and its replicate lane 9 are complex 2. Lane 7 and its replicate lane 10 are complex 3.
